# Supplementary material for: Metoclopramide as a prokinetic agent for diabetic gastroparesis: revisiting the risk of Parkinsonism
Source: PubMed Central journal article supplement — Ther Adv Drug Saf. 2019 Jun 20;10:2042098619854007. doi: 10.1177/2042098619854007 (PMC6587390; doi:10.1177/2042098619854007), 2019-06-20
Supplement: esupp_file-20181002.pdf [file esupp_file-20181002.pdf]

The electronic supplementary material

Table S1 The consumption of metoclopramide for patients with diabetes aged over 45 according to calendar year

| Year | total<br>(A) | No. of overuse<br>(B) | No. of use<br>(C) | Overuse rate (%)<br>(B/C) | Utilization rate (%)<br>(C/A) | the cumulative dose for the longest continuous duration |       |      |        |       |
|------|--------------|-----------------------|-------------------|---------------------------|-------------------------------|---------------------------------------------------------|-------|------|--------|-------|
|      |              |                       |                   |                           |                               | mean                                                    | SD    | Q1   | Median | Q3    |
| 1999 | 18,357       | 282                   | 2,830             | 10.0                      | 15.4                          | 74.5                                                    | 145.0 | 9.0  | 21.0   | 63.0  |
| 2000 | 23,099       | 451                   | 3,653             | 12.3                      | 15.8                          | 98.9                                                    | 208.9 | 12.0 | 25.0   | 84.0  |
| 2001 | 27,869       | 638                   | 4,442             | 14.4                      | 15.9                          | 109.4                                                   | 230.9 | 12.0 | 28.0   | 96.0  |
| 2002 | 32,722       | 818                   | 5,140             | 15.9                      | 15.7                          | 125.4                                                   | 272.2 | 14.0 | 32.0   | 105.0 |
| 2003 | 37,609       | 926                   | 5,686             | 16.3                      | 15.1                          | 132.9                                                   | 298.8 | 15.0 | 36.0   | 112.0 |
| 2004 | 43,157       | 1,194                 | 6,981             | 17.1                      | 16.2                          | 131.1                                                   | 281.6 | 18.0 | 36.0   | 126.0 |
| 2005 | 48,644       | 1,399                 | 7,762             | 18.0                      | 16.0                          | 136.9                                                   | 313.7 | 18.0 | 37.0   | 126.0 |
| 2006 | 52,355       | 1,432                 | 8,110             | 17.7                      | 15.5                          | 134.1                                                   | 320.8 | 17.0 | 36.0   | 119.0 |
| 2007 | 56,360       | 1,357                 | 8,223             | 16.5                      | 14.6                          | 130.0                                                   | 330.1 | 15.0 | 33.0   | 112.0 |
| 2008 | 59,373       | 1,247                 | 8,039             | 15.5                      | 13.5                          | 122.9                                                   | 348.1 | 14.0 | 30.0   | 102.0 |

Table S2 The consumption of metoclopramide for patients with hypertension aged over 45 according to calendar year

| Year | total<br>(A) | No. of overuse<br>(B) | No. of use<br>(C) | Overuse rate (%)<br>(B/C) | Utilization rate (%)<br>(C/A) | the cumulative dose for the longest continuous duration |       |      |        |       |
|------|--------------|-----------------------|-------------------|---------------------------|-------------------------------|---------------------------------------------------------|-------|------|--------|-------|
|      |              |                       |                   |                           |                               | mean                                                    | SD    | Q1   | Median | Q3    |
| 1999 | 27,568       | 317                   | 3,656             | 8.7                       | 13.3                          | 73.2                                                    | 143.5 | 9.0  | 21.0   | 63.5  |
| 2000 | 44,326       | 670                   | 6,972             | 9.6                       | 15.7                          | 81.0                                                    | 171.7 | 12.0 | 24.0   | 72.0  |
| 2001 | 55,234       | 1,026                 | 8,931             | 11.5                      | 16.2                          | 92.2                                                    | 190.2 | 12.0 | 27.0   | 84.0  |
| 2002 | 65,596       | 1,358                 | 10,472            | 13.0                      | 16.0                          | 104.1                                                   | 227.2 | 14.0 | 28.0   | 90.0  |
| 2003 | 76,269       | 1,604                 | 11,428            | 14.0                      | 15.0                          | 115.1                                                   | 260.1 | 15.0 | 32.0   | 102.0 |
| 2004 | 87,945       | 2,086                 | 14,312            | 14.6                      | 16.3                          | 116.3                                                   | 266.2 | 15.0 | 32.0   | 105.0 |
| 2005 | 99,038       | 2,450                 | 15,524            | 15.8                      | 15.7                          | 123.2                                                   | 293.4 | 18.0 | 35.0   | 111.0 |
| 2006 | 106,417      | 2,554                 | 16,543            | 15.4                      | 15.5                          | 120.4                                                   | 303.5 | 15.0 | 33.0   | 105.0 |
| 2007 | 113,857      | 2,521                 | 16,476            | 15.3                      | 14.5                          | 117.4                                                   | 303.7 | 15.0 | 30.0   | 99.0  |
| 2008 | 119,417      | 2,299                 | 15,903            | 14.5                      | 13.3                          | 111.6                                                   | 297.5 | 14.0 | 28.0   | 93.0  |

Table S3 Definition of disease and medication

|                              | ICD-9-CM/ATC code | Note                                                     |
|------------------------------|-------------------|----------------------------------------------------------|
| <b>Disease</b>               |                   |                                                          |
| parkinsonism                 | 332.0 or 332.1    | neurology outpatient $\geq 3$                            |
| diabetes                     | 250.x or A181     | outpatient $\geq 3$ within one year or discharge         |
| hypertension                 | 401               | outpatient $\geq 3$ within one year or discharge         |
| hyperlipidemia               | 272               | outpatient $\geq 3$ within one year or discharge         |
| stroke                       | 430-434           | outpatient $\geq 3$ within one year or discharge         |
| episodic mood disorders      | 296               | outpatient $\geq 3$ within one year or discharge         |
| schizophrenic disorders      | 295               | outpatient $\geq 3$ within one year or discharge         |
| <b>Medication</b>            |                   |                                                          |
| metoclopramide               | A03FA01           | All prescriptions between cohort entry and index date.   |
| Blood glucose lowering drugs | A10B              | At least 60 dispensing day after cohort entry.           |
| insulin                      | A10A              | Any prescriptions within one year after cohort entry.    |
| statin                       | C10AA             | Any prescriptions within one year prior to cohort entry. |
| antipsychotic drugs          | N05A              | Any prescriptions within one year prior to cohort entry. |
